# Supplementary material for: Experimental bacterial dysbiosis with consequent immune alterations increase intrarectal SIV acquisition susceptibility
Source: PubMed Central journal article supplement — Cell Rep. Author manuscript; Available in PMC 2023 Mar 7. (PMC9989505; doi:10.1016/j.celrep.2023.112020), 2023-01-23
Supplement: NIHMS1872732-supplement-1.pdf [file NIHMS1872732-supplement-1.pdf]

**Cell Reports, Volume 42**

**Supplemental information**

**Experimental bacterial dysbiosis with consequent  
immune alterations increase intrarectal  
SIV acquisition susceptibility**

**Alexandra M. Ortiz, Phillip J. Baker, Charlotte A. Langner, Jennifer Simpson, Apollo Stacy, Jacob K. Flynn, Carly E. Starke, Carol L. Vinton, Christine M. Fennessey, Yasmine Belkaid, Brandon F. Keele, and Jason M. Brenchley**

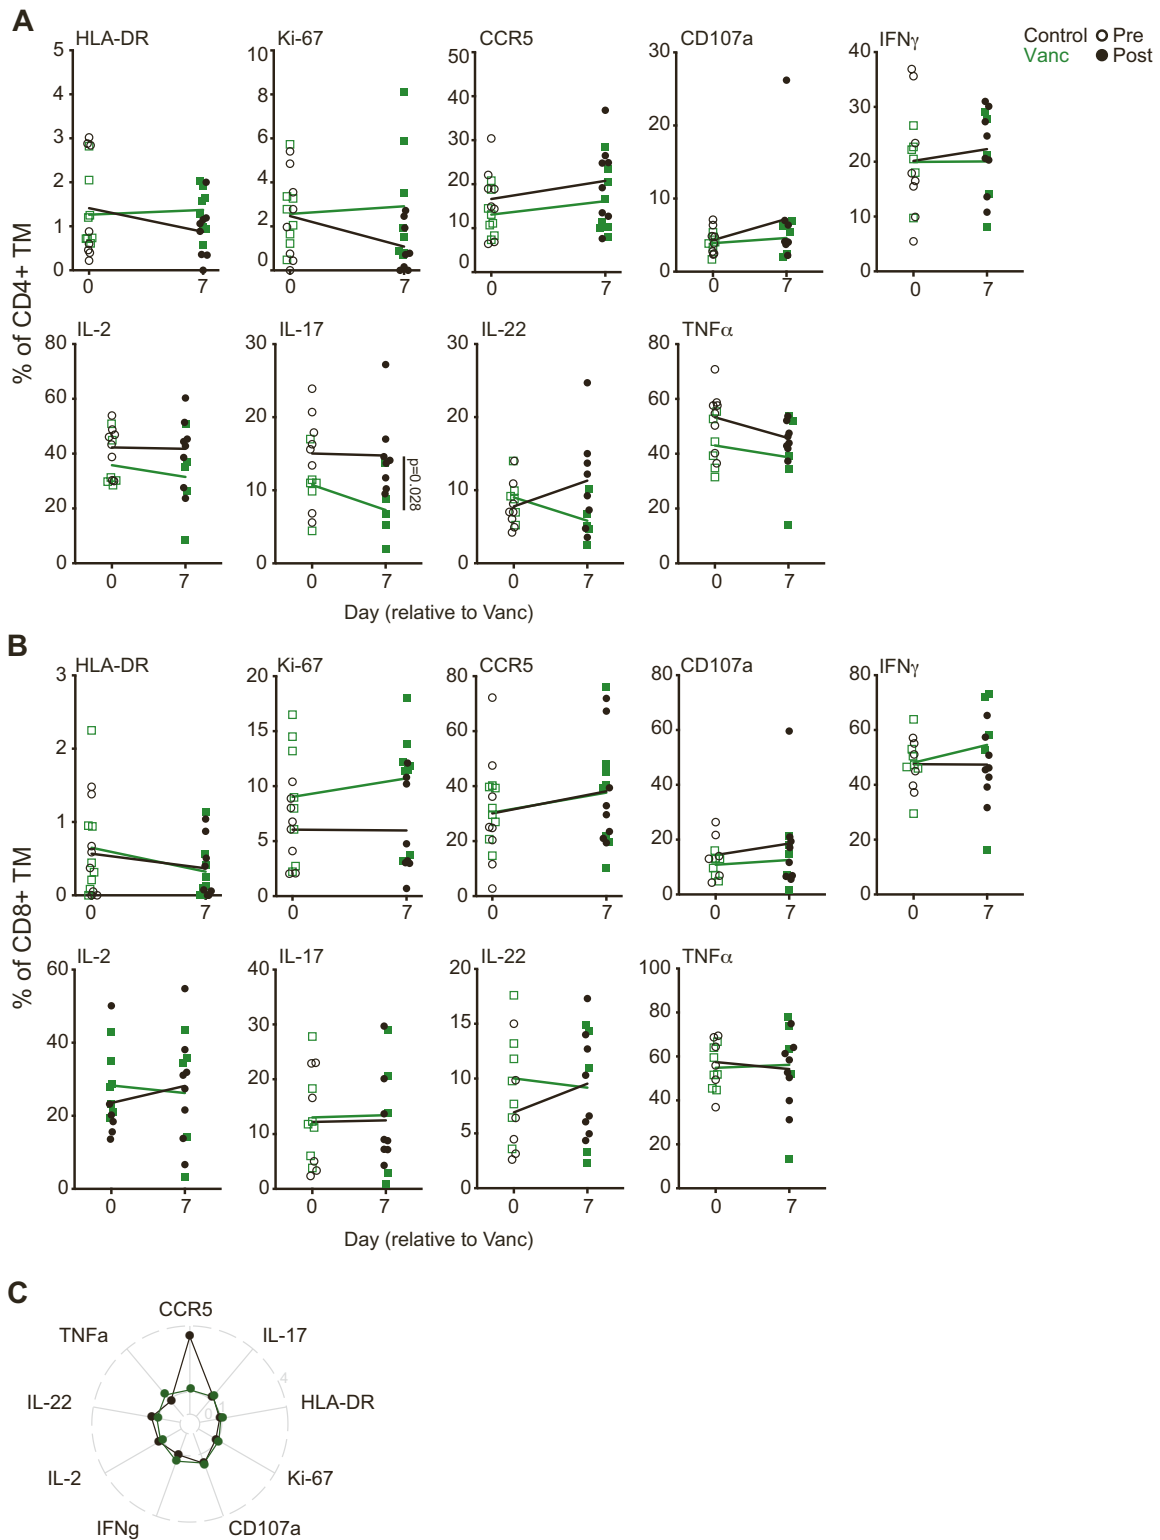

**Figure S1. Vancomycin treatment does not promote overt immune activation in RMs.**

**(A-B)** Frequencies of rectal activation markers and stimulation-induced cytokines in CD4+ TM (A) and CD8+ TM (B) across the pre-challenge phase. **(C)** Radar plot depicting fold-change from baseline (post- versus pre-Vanc timepoint) expression of rectal CD8+ TM activation markers and stimulation-induced cytokines. All lines represent mean per group. Data points are derived from 1 biological replicate, n=5-8 per group. Significance assessed by unpaired or paired two-way t-test. Vertical p-value denotes significance post-treatment.

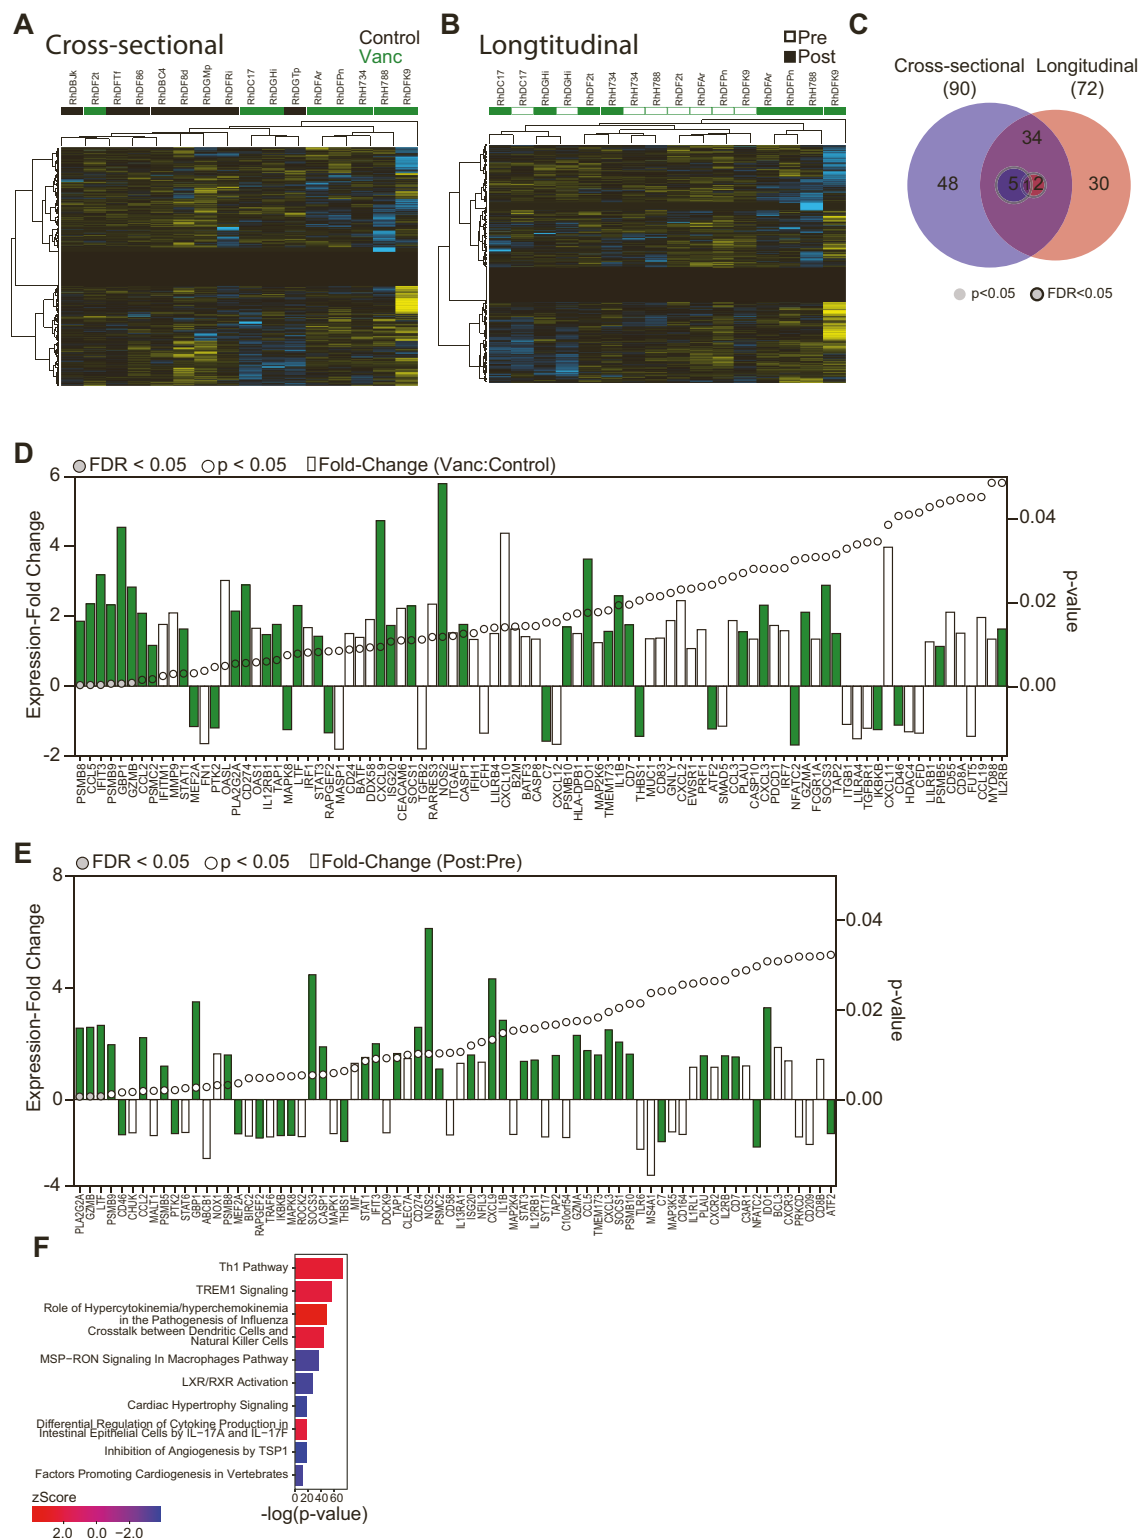

**Figure S2. Vancomycin treatment is associated with a differentially regulated transcriptome.**

**(A-B)** Heatmap depicting relative rectal transcript abundance as assessed by NanoString in cross-sectional samples at day 7 post-treatment (A) and in longitudinal samples pre- and post-treatment (B). Transcript values and samples are clustered by Euclidian distance with animal treatment and acquisition identifiers indicated below the heatmap. **(C)** Venn-diagram depicting the number of Nanostring-quantified, differentially-abundant genes in cross-sectional and longitudinal comparisons as in A-B. **(D-E)** Differentially abundant transcripts identified by NanoString in cross-sectional (D) and longitudinal (E) analyses as in A-B. Transcripts are ordered by ascending p-value, with significance values shown in circles, aligned to the right axis. Transcript expression fold-change values are shown by bars, aligned to the left axis. **(F)** p-values and z-scores of the top 5 cross-sectionally enriched and diminished pathways ( $z\text{-score} > |\pm 2.0|$ ) as identified by IPA, from NanoString-quantified transcript counts in rectal homogenates. Data points are derived from 1 biological replicate,  $n=8$  per group. Significance methods as follows: Welch's t-test with Benjamini-Yekutieli FDR (C-E), and Fisher's Exact Test (F).

**Supplementary Table 1. Animal Characteristics**

| <b>Animal</b> | <b>Group</b> | <b>Age at Study Initiation (years)</b> | <b>Testosterone at Study Initiation (pg/mL)</b> | <b>T/F variants</b> | <b>Challenge Number</b> |
|---------------|--------------|----------------------------------------|-------------------------------------------------|---------------------|-------------------------|
| RhDBC4        | Control      | 14.1                                   | 1228.38                                         | 1                   | 3                       |
| RhDBJk        | Control      | 14.3                                   | 2093.40                                         | 1                   | 1                       |
| RhDF86        | Control      | 7.0                                    | 1484.52                                         | 2                   | 3                       |
| RhDF8d        | Control      | 6.3                                    | 910.98                                          | 1                   | 5                       |
| RhDFRi        | Control      | 6.0                                    | 1423.86                                         | 1                   | 11                      |
| RhDFTf        | Control      | 6.0                                    | 1023.03                                         | 1                   | 1                       |
| RhDGMp        | Control      | 4.3                                    | 927.49                                          | 1                   | 7                       |
| RhDGTp        | Control      | 3.0                                    | 832.65                                          | 1                   | 2                       |
| RhDC17        | Vanc         | 14.3                                   | 1636.14                                         | 1                   | 2                       |
| RhDF2t        | Vanc         | 6.3                                    | 3280.69                                         | 2                   | 4                       |
| RhDFAr        | Vanc         | 7.3                                    | 1332.20                                         | 1                   | 3                       |
| RhDFK9        | Vanc         | 5.0                                    | 1807.80                                         | 6                   | 2                       |
| RhDFPn        | Vanc         | 6.0                                    | 1980.75                                         | 1                   | 2                       |
| RhDGHi        | Vanc         | 4.3                                    | 816.43                                          | 1                   | 2                       |
| RhH734        | Vanc         | 17.1                                   | 1688.38                                         | 10                  | 6                       |
| RhH788        | Vanc         | 14.3                                   | 4480.30                                         | 5                   | 1                       |
